# Supplementary material
Source: Springer Nature journal article supplement (https://www.springermedizin.de/resource/supplementary/12936_2014_3366_MOESM5_ESM.pdf/9545740)
Supplement: MOESM5 [file 9545740]

Additional file 5 : Metabolic pathways modified by cepharanthine.

| Function                         | Metabolic Pathway        | Compleat name of the Pathway                                       | Number of pathway's gene in the selection | Total number of genes in the pathway | Number of genes in the selection | Number of genes in PlasmDB | P-value Fisher exact t-test right tail |
|----------------------------------|--------------------------|--------------------------------------------------------------------|-------------------------------------------|--------------------------------------|----------------------------------|----------------------------|----------------------------------------|
| Amino Acid                       | LysineMetabolism         | Lysine metabolism                                                  | 3                                         | 6                                    | 781                              | 5685                       | 0.038                                  |
| Amino Acid                       | alanAspartate            | Asparagine and Aspartate Metabolism                                | 3                                         | 8                                    | 781                              | 5685                       | 0.085                                  |
| Amino Acid                       | nitrogenmetpath          | Nitrogen Metabolism                                                | 4                                         | 9                                    | 781                              | 5685                       | 0.025                                  |
| Carbohydrate                     | glycolysispath           | Glycolysis                                                         | 9                                         | 28                                   | 781                              | 5685                       | 0.010                                  |
| Cell-Cell interaction            | cytoadherencescheme      | Cytoadherence: constitutive and inducible receptors                | 99                                        | 333                                  | 781                              | 5685                       | 2.49E-013                              |
| Cell-Cell interaction            | rosetting                | Cytoadherence: Rosette formation between normal and infected RBC   | 91                                        | 317                                  | 781                              | 5685                       | 1.54E-011                              |
| Cofactors & other substances     | riboflavin               | Riboflavin metabolism                                              | 2                                         | 4                                    | 781                              | 5685                       | 0.094                                  |
| Hemoglobine digestion            | hemoglobinpolpath        | Hemoglobin Digestion & Ferriprotoporphyrin IX Polymerization       | 7                                         | 26                                   | 781                              | 5685                       | 0.057                                  |
| Invasion & motility              | DomSurfaceProt           | Domains of merozoite surface proteins                              | 9                                         | 14                                   | 781                              | 5685                       | 1.88E-005                              |
| Invasion & motility              | proteinsLocalizpath      | Subcellular localization of proteins involved in invasion          | 19                                        | 79                                   | 781                              | 5685                       | 0.010                                  |
| Invasion & motility              | Merozoiteproteins        | Functional annotation of merozoite invasion-related proteins       | 16                                        | 74                                   | 781                              | 5685                       | 0.043                                  |
| Lipids                           | phcholine                | Phosphatidylcholine metabolism                                     | 8                                         | 24                                   | 781                              | 5685                       | 0.012                                  |
| Lipids                           | phserine                 | Phosphatidylethanolamine and phosphatidylserine metabolism         | 12                                        | 48                                   | 781                              | 5685                       | 0.027                                  |
| Lipids                           | isoprenoidmetpath        | Isoprenoids Metabolism                                             | 5                                         | 14                                   | 781                              | 5685                       | 0.034                                  |
| Lipids                           | utilPhospho              | Utilization of phospholipids                                       | 10                                        | 46                                   | 781                              | 5685                       | 0.093                                  |
| Organellar function              | apicoplastgenes          | Nuclear genes with apicoplast signal sequences                     | 63                                        | 281                                  | 781                              | 5685                       | 8.38E-005                              |
| Organellar function              | importMito               | Import of proteins into the mitochondrion                          | 11                                        | 24                                   | 781                              | 5685                       | 1.52E-004                              |
| Organellar function              | chaperone                | Chaperone network and protein quality control of the mitochondrion | 9                                         | 40                                   | 781                              | 5685                       | 0.091                                  |
| Organellar function. Lipids      | facidsynthesispath       | Fatty acid synthesis in the apicoplast                             | 13                                        | 40                                   | 781                              | 5685                       | 0.002                                  |
| Post translational modifications | gluth_prot               | S-Glutathionylated proteins                                        | 58                                        | 318                                  | 781                              | 5685                       | 0.017                                  |
| Post translational modifications | prenylation              | N-myristoylation. S-acylation and prenylation of proteins          | 7                                         | 25                                   | 781                              | 5685                       | 0.047                                  |
| Post translational modifications | complex_ubiquitin_ligase | Anaphase promoting complex ubiquitin-ligase                        | 4                                         | 11                                   | 781                              | 5685                       | 0.053                                  |
| Post translational modifications | SCF                      | SCF (Skp1-Cullin-F-box) ubiquitin-ligase                           | 5                                         | 16                                   | 781                              | 5685                       | 0.058                                  |
| Protein traffic                  | MCprot                   | Established and putative Maurer's clefts proteins                  | 38                                        | 109                                  | 781                              | 5685                       | 3.29E-008                              |
| Protein traffic                  | Maurer                   | Exported parasite proteins associated with Maurer's clefts         | 5                                         | 11                                   | 781                              | 5685                       | 0.011                                  |
| Redox metabolism                 | redoxmetpath             | Redox Metabolism                                                   | 8                                         | 34                                   | 781                              | 5685                       | 0.087                                  |
| Transcription                    | DNAAP2                   | DNA binding proteins with AP2 domain(s)                            | 6                                         | 20                                   | 781                              | 5685                       | 0.047                                  |
| Transport                        | transporters             | Genes coding for transport proteins                                | 25                                        | 120                                  | 781                              | 5685                       | 0.022                                  |
| Transport                        | PPM                      | Transporters of the plasma membrane                                | 13                                        | 64                                   | 781                              | 5685                       | 0.095                                  |

Over-represented pathways were annotated/grouped into functions according to the Malaria Parasite Metabolic Pathways database. P-values were obtained by Fisher exact t-tests. The threshold of significance is 0.05.
